# Supplementary material for: RIOK1 kinase activity is required for cell survival irrespective of MTAP status
Source: PubMed Central journal article supplement (PMC6033344; doi:10.18632/oncotarget.25586), 2018-06-19
Supplement: oncotarget-09-28625-s001.pdf [file oncotarget-09-28625-s001.pdf]

## RIOK1 kinase activity is required for cell survival irrespective of *MTAP* status

### SUPPLEMENTARY MATERIALS

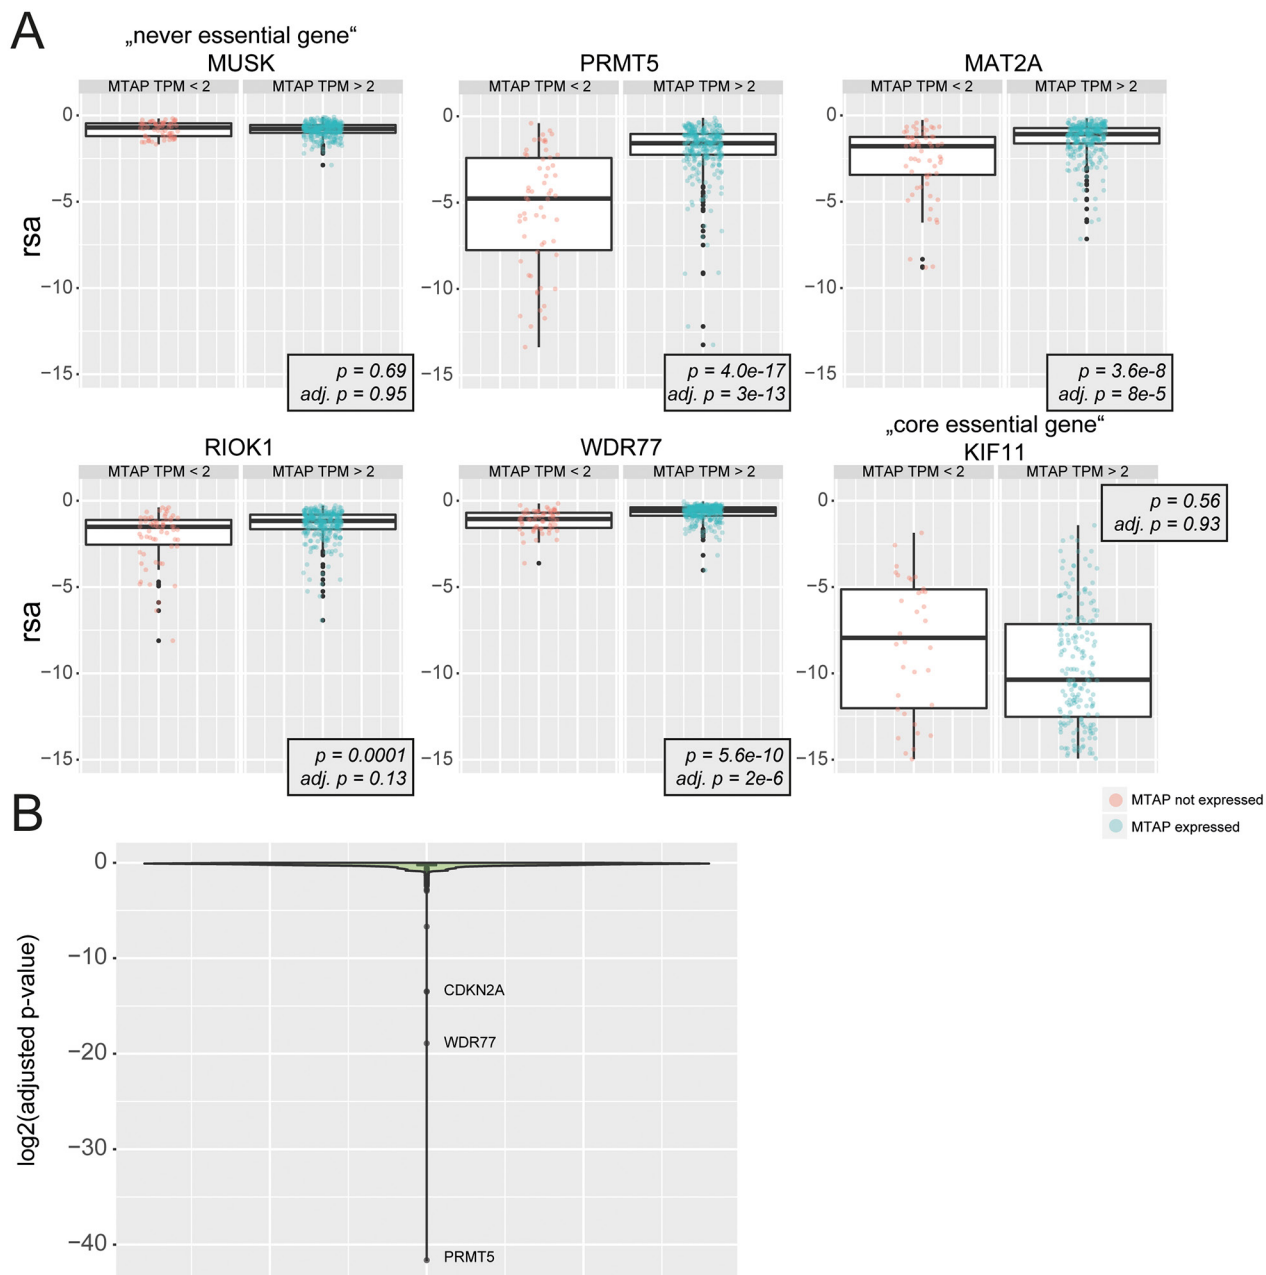

**Supplementary Figure 1:** (A) Boxplots (overlaid: individual data points) depict depletion scores between MTAP non-expressing cells (MTAP TPM < 2) and MTAP expressing cells (MTAP TPM > 2) for the “never essential gene” *MUSK*, *PRMT5*, *MAT2A*, *RIOK1*, *WRD77* and the “core essential gene” *KIF11*. P-values and adjusted p-values for Wilcoxon test statistics are indicated in boxes. Y- axis depicts the *rsa* score as reported in [21]. (B) Explorative analysis for differentially required genes between MTAP expressing and non-expressing cells. Violin- and boxplot of  $\log_2$  adjusted p-values (Wilcoxon test).

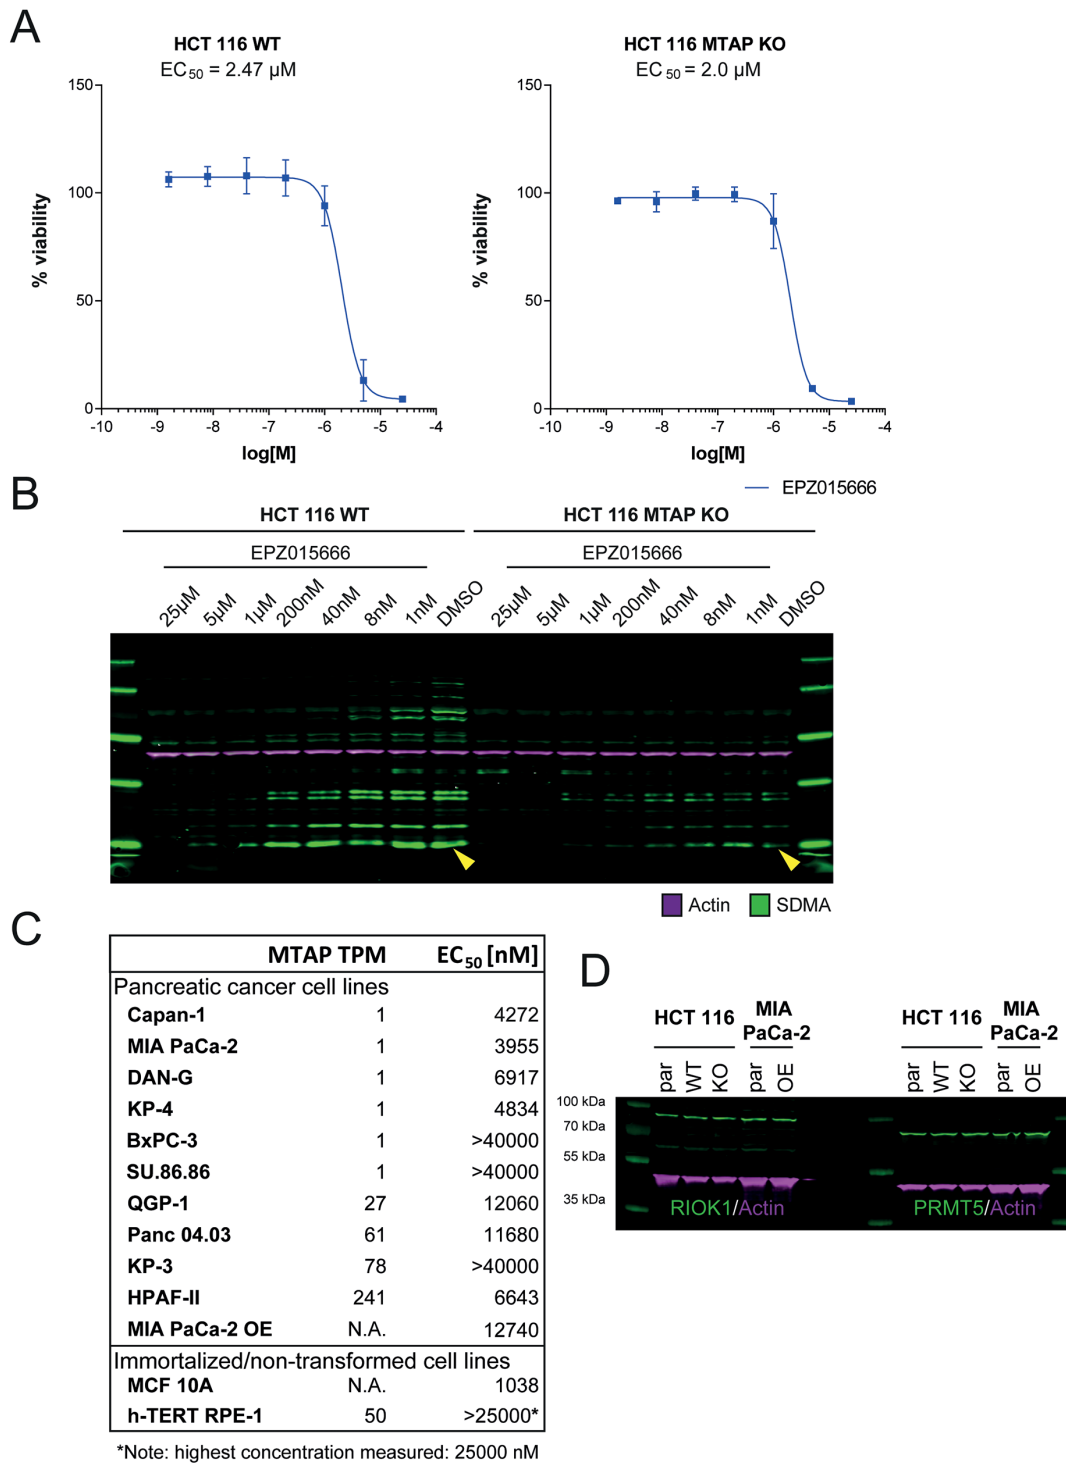

**Supplementary Figure 2:** (A) Dose response curves of EPZ015666 in HCT 116 *MTAP* WT and *MTAP* KO cells. (B) Western Blot for SDMA (green) and Actin (loading control, magenta) upon 96h treatment with different EPZ015666 concentrations. Yellow arrowhead points out comparable band at same size. (C) Cell viability assays performed after 8 days of incubation with EPZ015666. MTAP expression values are depicted in TPM (transcripts per million). EC<sub>50</sub> values are in nM. Note: MIA PaCa-2 OE refers to MIA PaCa-2 cells overexpressing MTAP. TPM value for MIA PaCa-2 OE cell line has not been determined (N.A.). (D) Western blot assays comparing RIOK1 (green) and PRMT5 (green) protein levels in HCT 116 parental (par), HCT 116 wild type clone (WT), HCT 116 *MTAP* knockout (KO), MIA PaCa-2 parental (par) and MIA PaCa-2 *MTAP* overexpressing (OE) cells.

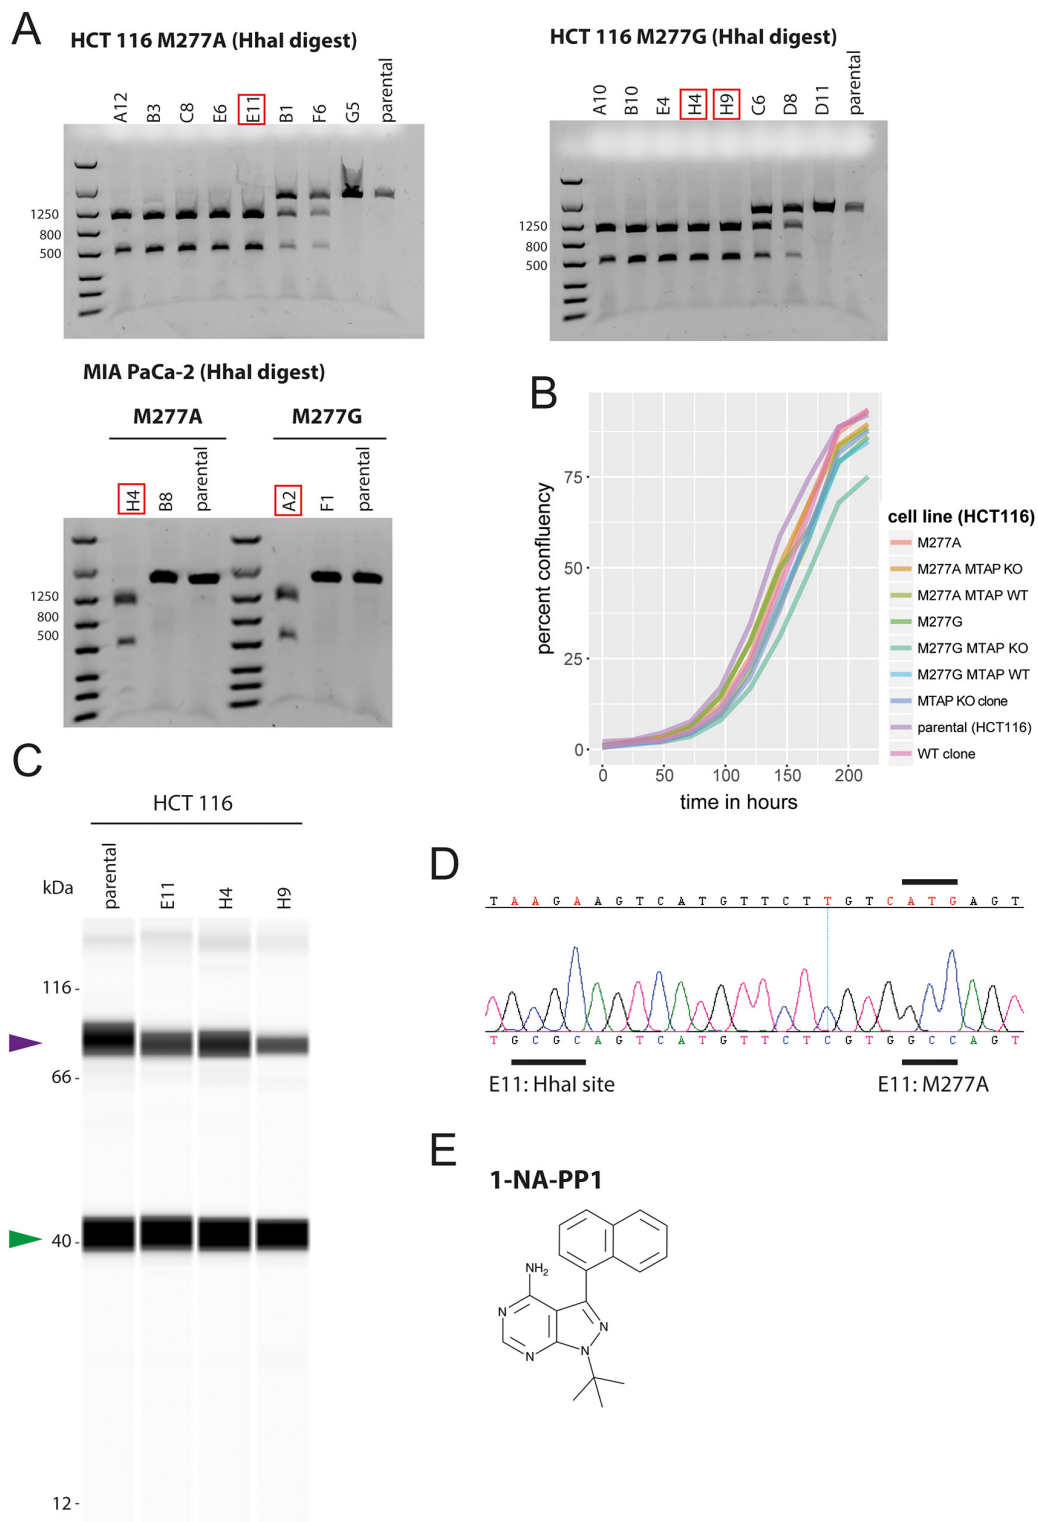

**Supplementary Figure 3:** (A) Restriction enzyme analysis of genome edited *RIOK1* alleles. Presence of double band indicates complete editing. Single uncut band indicates WT allele. Red boxes indicate selected clones. (B) Cell growth assay comparing the growth rate of different engineered and parental HCT 116 cell lines. (C) *RIOK1* protein expression analysis using a capillary based immunoassay. Upper bands (magenta arrowhead) correspond to *RIOK1*; lower bands (green arrowhead) correspond to *GAPDH*. Cell lines and clone identifiers are indicated on top. (D) Representative chromatogram of a Sanger sequencing experiment to confirm the full editing of the *RIOK1* gatekeeper residue of HCT 116 clone E11. (E) Structure of the 1-NA-PP1 analog.

**A**

**MIA PaCa-2**

|                            | parental | MTAP OE |
|----------------------------|----------|---------|
| <b>MIA PaCa-2 parental</b> |          |         |
| 1-NA-PP1                   | 8576.48  | 7984.05 |
| Panobinostat               | 4.74     | 7.43    |
| <b>M277A (H4)</b>          |          |         |
| 1-NA-PP1                   | 79.88    | 78.66   |
| Panobinostat               | 3.82     | 4.19    |
| <b>M277G (A2)</b>          |          |         |
| 1-NA-PP1                   | 234.52   | 379.28  |
| Panobinostat               | 1.55     | 3.66    |

EC50 96h Cell Viability Assay [nM]

**B**

**HCT 116**

|                         | parental | MTAP KO | MTAP WT |
|-------------------------|----------|---------|---------|
| <b>HCT 116 parental</b> |          |         |         |
| 1-NA-PP1                | 4742.3   | 11434.3 | 12282.8 |
| Panobinostat            | 9.2      | 8.0     | 7.9     |
| <b>M277A (E11)</b>      |          |         |         |
| 1-NA-PP1                | 461.89   | 270.2   | 373.0   |
| Panobinostat            | 10.2     | 10.4    | 8.4     |
| <b>M277G (H9)</b>       |          |         |         |
| 1-NA-PP1                | 364.8    | 114.9   | 262.0   |
| Panobinostat            | 10.0     | 7.3     | 7.8     |
| <b>M277G (H4)</b>       |          |         |         |
| 1-NA-PP1                | 579.3    | 360.3   | 568.2   |
| Panobinostat            | 9.5      | 7.6     | 10.0    |

EC50 96h Cell Viability Assay [nM]

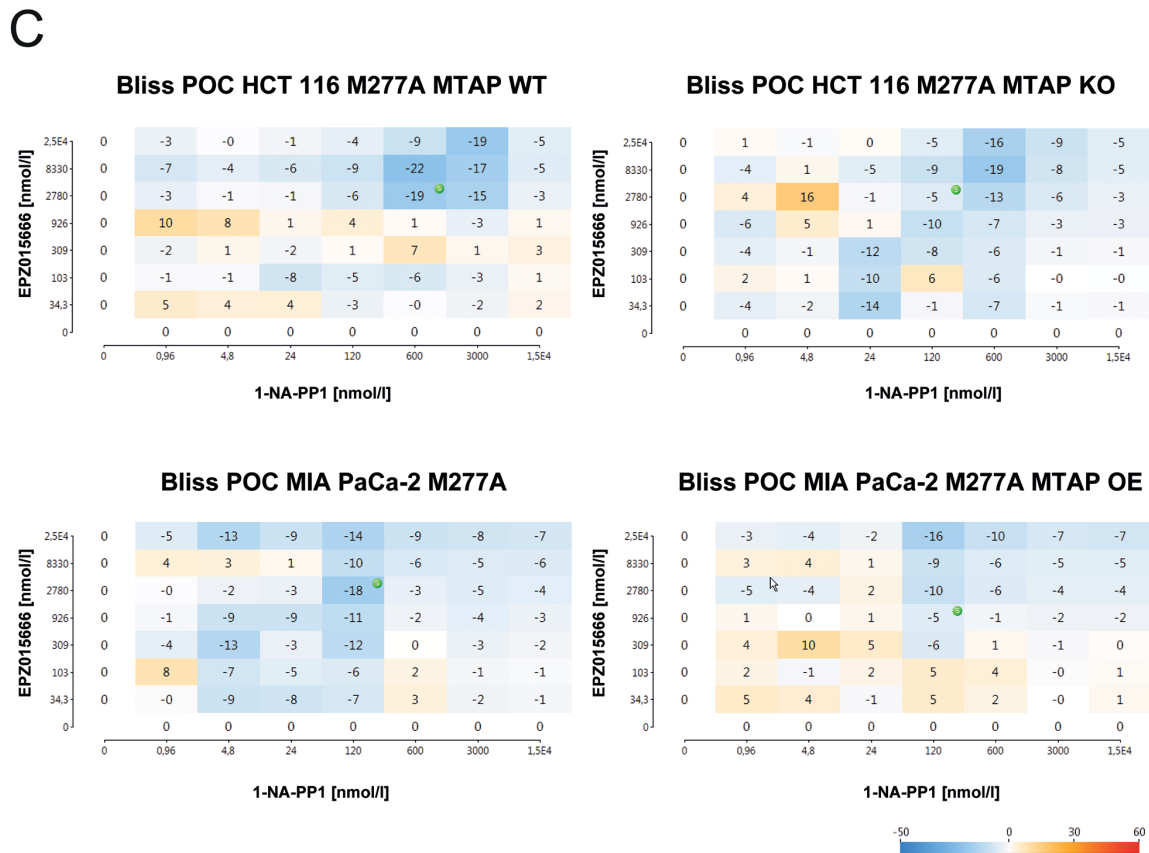

**Supplementary Figure 4:** (A) Table summarizing EC<sub>50</sub> values of 1-NA-PP1 and Panobinostat (control) in multiple independently derived isogenic MIA PaCa-2 clones. (B) Table summarizing EC<sub>50</sub> values of 1-NA-PP1 and Panobinostat (control) in multiple independently derived isogenic HCT 116 clones. (C) Combination drug matrix of percent of control (POC) CellTiter-Glo cell viability measurements of MIA PaCa-2 and HCT 116 *RIOK1* genome engineered cells treated with the indicated amounts of EPZ015666 and 1-NA-PP1. Values depict Bliss excess POC.

**Supplementary Table 1: Sequences for gRNAs, primers and CRISPR genome engineering repair templates used in this study.**

**See Supplementary File 1**

**Supplementary Table 2: CRISPR screen results HCT 116 wild type cells - epigenome domain CRISPR library (gRNA information see supplementary table 1).**

**See Supplementary File 2**

**Supplementary Table 3: CRISPR screen results HCT 116 MTAP knock out cells - epigenome domain CRISPR library (gRNA information see supplementary table 1).**

**See Supplementary File 3**

**Supplementary Table 4: CRISPR screen results HCT 116 wild type cells - kinase domain CRISPR library (gRNA information see supplementary table 1).**

**See Supplementary File 4**

**Supplementary Table 5: CRISPR screen results HCT 116 MTAP knock out cells - kinase domain CRISPR library (gRNA information see supplementary table 1).**

**See Supplementary File 5**
